# Reliability-Based Voxel Selection

Leyla Tarhan<sup>a\*</sup> & Talia Konkle<sup>a,b</sup>

<sup>a</sup> Department of Psychology, <sup>b</sup> Center for Brain Science  
Harvard University

33 Kirkland St., Cambridge, MA 02140

United States of America

\* Corresponding author: [ltarhan@g.harvard.edu](mailto:ltarhan@g.harvard.edu)

While functional magnetic resonance imaging (fMRI) studies typically measure responses across the whole brain, not all regions are likely to be informative for a given study. Which voxels should be considered? Here we propose a method for voxel selection based on the reliability of the data. This method isolates voxels that respond consistently across imaging runs while maximizing the reliability of multi-voxel patterns across the selected voxels, and is suitable for designs with at least 15 conditions. In two example datasets, we found that this proposed method defines a set of voxels that has a higher average multi-voxel pattern reliability compared to another common method, activity-based voxel selection. Broadly, this method has the advantage that there is no need to define regions or statistical thresholds *a priori* and puts the focus on data reliability as the first step in analyzing fMRI data.

**KEYWORDS:** fMRI, voxel selection, data reliability, condition-rich designs

## 1. INTRODUCTION

As functional magnetic resonance imaging reaches into its third decade of use in cognitive neuroscience, researchers continue to develop new ways to analyze patterns of activity in the brain. Current tools range from univariate contrasts to Representational Similarity Analysis (Kriegeskorte, 2008), decoding (Cox & Savoy, 2003; Hanson et al., 2004; Norman et al., 2006), encoding models (Mitchell et al., 2008; Huth et al., 2012), clustering (Lashkari et al., 2010), and more. These analyses vary in complexity and the types of questions they answer. But in all cases, the researcher must first answer the same question: where in the brain should these analyses be done?

The possible answers to this question fall along a spectrum between focusing on specific regions of interest (ROIs) and considering every voxel in the brain. ROI-based research (e.g., Johansen-Berg et al., 2004; Saxe et al., 2006) typically restricts all analyses to an area of cortex defined using separate functional or anatomical localizers. ROI approaches make two assumptions: that these voxels are interesting regions of cortex to investigate, and that they might make up a homogenous unit, serving the same cognitive functions (though careful researchers have tested this second assumption before arguing that an ROI is a fundamental theoretical unit; e.g., Duncan & Owen, 2000; Jiang & Kanwisher, 2003). As a benefit, targeted ROI analyses circumvent the statistical challenge of correcting for multiple comparisons, which occurs when analyses are done at the whole-brain level.

In contrast to an ROI-based approach, whole-brain approaches (e.g. whole-brain contrasts, information mapping techniques, and searchlight analyses; Norman et al., 2006; Kriegeskorte et al., 2006) have the advantage of not relying on pre-conceived ideas about where in the brain one might expect an effect. However, these analyses require stringent corrections for multiple comparisons, which can obscure all but the strongest effects, running counter to the goal of obtaining and analyzing data at a fine spatial scale. Additionally, searchlight analyses, which are effectively roving ROI analyses using spheres of voxels (Norman et al., 2006; Kriegeskorte et al., 2006), also require implicit pre-conceived hypotheses about neural coding: researchers must have a hypothesis about the spatial scale at which an effect will be observed, and also make the assumption that these mini-regions-of-interest are spherical.

One additional challenge for whole-brain approaches is that they do not address the issue of variable signal quality over the brain. It is well known that the signal measured in fMRI varies significantly over the cortex, and in some cases carries a troubling amount of noise (Eklund et al., 2016). Further, the quality of the signal may depend upon the task – for example, areas in the fronto-parietal attention network might respond more consistently during an attentionally-demanding task than when freely viewing an image. Therefore, another approach that sits between the ROI-based and whole-brain extremes is to isolate a relatively broad swathe of cortex with a high-quality signal, such as visually-responsive voxels within occipito-temporal cortex.

Unlike more classic regions of interest, a broad swathe approach does not assume that these selected voxels make up a singular functional unit *per se*; rather, it assumes that responses in these voxels are more relevant to the researcher's analysis plan and hypothesis than the rest of the brain. Within these broad regions, analyses can be done to assess population coding (Haxby et al., 2011; Haxby, 2012), or to characterize the large-scale structure of response preferences (e.g., Hasson et al., 2002; Hasson et al., 2003; Orlov et al., 2010; Konkle & Oliva, 2012), or to evaluate encoding models (e.g. Mitchell et al., 2008). The benefit of this approach is that the cortex under consideration is more extensive than a small ROI, while still being relevant to the theoretical questions at stake. However, a challenge for this approach is that it is not obvious how to select these high-quality voxels in the first place. Different researchers have approached this challenge in different ways.

First, one popular method is to select the voxels that are most “active” in response to the stimuli (Kriegeskorte et al., 2008; Konkle & Oliva, 2012; Mur et al., 2013; Jozwick et al., 2016; Kay et al., 2017). This responsiveness is often measured with a contrast between all stimulus conditions and rest: voxels with a  $t$ -value greater than some pre-set bound (e.g.,  $t > 2$ ) are considered “active.” In other words, this method isolates regions that respond positively on average across stimulus conditions, relative to baseline. Given that this is a popular choice in many recent fMRI papers – especially

those studying the visual cortex, as we do – we treat the activity-based voxel selection method as the main comparison for the reliability-based method described here. Activity-based voxel selection is sensitive to the signal strength of a given voxel because it is based on *t*-values, which are low if noise is high; however, this method is *not* sensitive to systematic differences across conditions, as voxels that respond equally across all conditions could still be considered active.

Another voxel-selection approach identifies voxels that maximize the variance among conditions (Pereira et al., 2009), or that are well-fit by a candidate feature model (Nishimoto et al., 2011; Naselaris et al., 2012, Guclu & van Gerven, 2015; Huth et al., 2016). This approach makes sense within a modeling framework, but in most cases requires a pre-specified threshold for “well-fit” voxels. Relatedly, other researchers have focused on selecting voxels that respond stably across conditions. For example, Mitchell et al. (2008) used a cross-validation procedure to isolate voxels that respond similarly across folds of the data. Similarly, Norman-Haignere et al. (2015) selected voxels that were both active (showed a significant response to sounds vs. silence) and responded consistently across scans. These selection methods are sensitive to the activation profile of each voxel, but are also limited because they rely on a pre-set statistical threshold or require independent datasets for voxel selection and model testing.

The current paper introduces a procedure for voxel selection that starts from a similar logic as this last method, but instead selects voxels based on their *reliability* across scans. Specifically, in the first step, the reliability of every voxel is computed based on their response profiles over conditions in two halves of the data. Next, a range of voxel-reliability thresholds are considered, and the stability of the multi-voxel patterns within the voxels that survive each threshold is assessed for each condition. Finally, the researcher can select a reliability cutoff to select the final set of voxels, while explicitly being able to balance the tradeoffs between maximizing spatial coverage on one hand and multi-voxel pattern reliability on the other. This forms the first step in an fMRI analysis: once the reliable voxels are selected, all subsequent analyses can be conducted in only these voxels.

Our method differs from previous stability-based approaches in two key ways. First, the process of identifying an acceptable reliability threshold is done based on the data, without specifying a parameter value *a priori*. Second, our method selects voxels whose responses vary across conditions; that is, voxels that respond more to some conditions than to others. This contrasts with the method used in Norman-Haignere et al. (2015), which includes regions that respond similarly to all conditions. Thus, our method is especially well-suited to analyses that leverage the variance in the data, for example to predict brain responses or representational dissimilarities using feature models.

Here, we illustrate the use of this reliability-based voxel selection procedure on a typical set of condition-rich fMRI data: whole-brain responses to 60 everyday actions (Tarhan & Konkle, 2019). In order to demonstrate the consequences of using this method, we compare the set of voxels selected using our method with those selected based on their overall activity. To preview, we find that reliability-based selection results in a smaller set of voxels with higher overall multivoxel condition-pattern reliability compared to activity-based selection. These results replicated in a separate dataset of responses to 72 everyday objects (Magri et al., 2019).

## 2. MATERIALS AND METHODS

### 2.1 Dataset Description

The primary dataset used in this paper consists of whole-brain functional responses to 60 everyday action videos, collected from 13 human subjects (**Figure 1a**). Participants completed four functional runs, during which they freely viewed the 2.5-second videos and detected an occasional red frame to maintain alertness. Functional and anatomical data were pre-processed using Brain Voyager QX software (Brain Innovation, Maastricht, Netherlands). General linear models (GLMs) were fit to data from odd and even functional runs with a regressor for each condition (one video). Each voxel's timecourse was first z-transformed within an fMRI run, then corrected for temporal autocorrelations. The beta weights were extracted from whole-brain GLMs, yielding estimates of each voxel's response to each condition. This was done separately for each participant, in addition to a whole-brain random effects GLM to quantify responses at the group-average level. More information can be found in Tarhan & Konkle (2019). For replication purposes, we also included a supplementary dataset collected from 11 human subjects viewing still images of 72 everyday objects (Magri et al., 2019). These data were pre-processed following similar procedures. Both datasets can be downloaded from the Open Science Framework (<https://osf.io/m9ykh/>). In order to perform reliability-based voxel selection, the only necessary components of these data are odd- and even-run beta values for each condition in every voxel.

## A Experimental Design

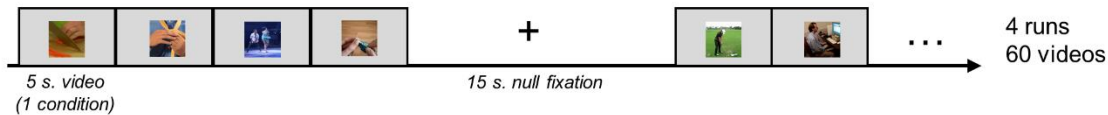

## B Split-half reliability calculations

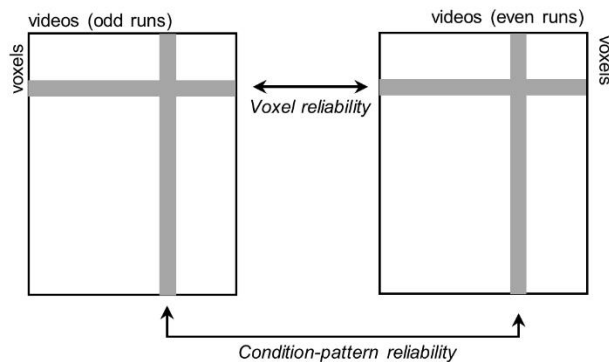

## C Whole-brain reliability map

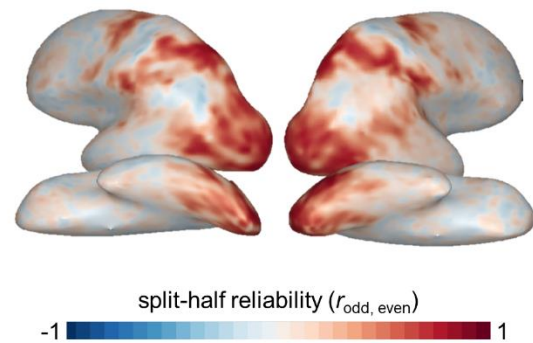

## D Threshold selection

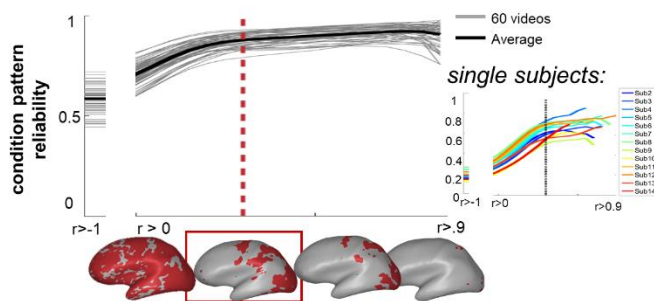

## E Selected voxels

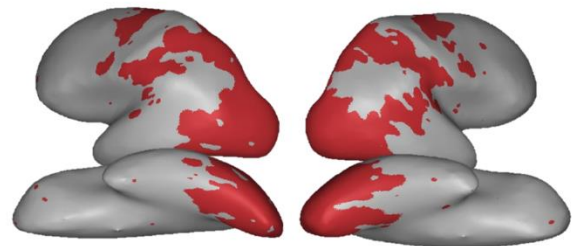

**Figure 1: Summary of the Reliability-Based Voxel Selection Procedure.** (a) Schematic of the experimental design for the main dataset: participants viewed 60 everyday action videos while detecting an occasional red frame to maintain attention. (b) Split-half reliability was computed for all voxels by correlating their beta weights for all 60 conditions across even and odd runs. Condition-pattern reliability was computed for all conditions (videos) by correlating beta weights over all voxels across even and odd runs. (c) Whole-brain map of split-half voxel reliability in this dataset. (d) Curve showing the pattern reliability for each condition (y-axis) at a range of possible voxel inclusion thresholds (x-axis). Red line indicates the final threshold selected for this dataset ( $r = 0.30$ ). Inset figure shows the same graph as in (d) but computed for individual subjects. Each line is the reliability curve for the average pattern reliability across conditions for one participant. (e) Voxels that survived the final inclusion threshold are shown in red.

### 2.2 Reliability-Based Voxel Selection

Reliability-based voxel selection proceeded in two steps, summarized in **Figure 1**. First, split-half reliability was calculated separately for each voxel in the brain by correlating each voxel's *response profile* (the vector of beta weights in response to each condition) across even and odd functional runs (**Figure 1b**). This produced a whole-



brain reliability map, with one  $r$ -value for each voxel in the cortex (**Figure 1c**). Second, to determine which voxels to include in subsequent analyses, we considered a continuum of possible thresholds (from  $r > 0$  to  $r > 0.95$ ). At each threshold, we calculated the reliability of each *condition pattern* (i.e. the multi-voxel pattern in response to a single condition) in voxels that survived that threshold. Condition pattern reliability was calculated by correlating each condition's multi-voxel response pattern across even and odd functional runs. This was computed separately for each condition, and then averaged across conditions. This analysis produced a smooth curve, where the average condition-pattern reliability increases as more reliable voxels are included in the selection (**Figure 1d**).

This curve also illustrates a natural tradeoff between the coverage and the stability of the data – simply choosing the threshold that produces the highest possible condition-pattern reliability limits coverage to a tiny fraction of the cortex (**Figure 1d**). While the data in that fraction will be highly reliable, this strategy runs counter to the aims of studying the large-scale structure of the cortex. On the other hand, a threshold that is too lax may include regions with erratic responses. Therefore, an optimal threshold for voxel inclusion balances coverage and the stability of the data, but its exact value depends on the goals of the experimenter. This curve serves as a guide to balance these tradeoffs. In our case, across datasets we observed that this curve has a plateau – after some critical point, increasing the inclusion threshold only minimally increases the data's reliability but continues to limit coverage. Therefore, we took this plateau point to be an appropriate inclusion threshold.

How should one select this point? To automatically detect its location, one could locate the point where the curve's second derivative equals zero, which intuitively is when the slope begins to level off. However, we recommend following a more heuristic method. We selected the plateau point by eye, and then considered a range of nearby thresholds to select one that provides good coverage of our general regions of interest while minimizing small, extraneous groups of voxels (“speckles”).

Critically, notice that this threshold decision is made independently of any hypotheses about how any region or voxel will respond to the conditions. Instead, this voxel selection procedure only depends on the fact that voxels respond consistently across scans but vary in how much they respond across conditions; it depends not at all on *which* conditions it responds to the most. Because of this, reliability-based voxel selection is independent of any particular hypotheses regarding the relationship among conditions. Thus, the entire dataset can be used to select reliable voxels; a separate validation dataset is not required (as is also true in similar methods, e.g., Mitchell et al., 2008).

In addition, it is important to note that reliability-based voxel selection is not sensitive to differences between voxels in overall response magnitude, because it uses a

correlation measure. For example, one voxel's response profile may be higher on average than another voxel's, but this difference in overall magnitude will not affect either voxel's reliability. Similarly, some conditions may drive the selected voxels more than other conditions (their condition pattern may be higher overall), but this also will not affect the measure. Instead, this procedure reflects where the *relative* patterns of activity across voxels are stable.

Finally, this method can be applied at the level of the group (**Figure 1d**) or individual subjects (**Figure 1d**, inset). Interestingly, in both datasets we found that the reliability plateaued at a very similar point across participants, even though that cutoff yielded a different number of reliable voxels for each participant. Therefore, we selected a reliability cutoff based primarily on the group-level data, then applied that cutoff to the single-subject data to define reliable voxels separately in each subject. Code implementing these procedures can be downloaded from the Open Science Framework (<https://osf.io/m9ykh/>).

### 3. RESULTS

#### 3.1 Reliability based voxel selection

We performed reliability-based voxel selection on our primary sample fMRI dataset, in which participants viewed short videos of people performing a wide range of actions. Based on the reliability curve shown in **Figure 1d**, we selected an inclusion threshold of  $r = 0.30$ . **Figure 1e** displays the voxels that survive this threshold. The selected voxels reveal extensive coverage of both the ventral and dorsal visual streams as well as primary somatosensory and motor cortices, while excluding less-reliable regions in the anterior and superior temporal lobe and the pre-frontal cortex.

#### 3.2 Comparing Reliability- and Activity-Based Voxel Selection

For comparison with this reliability-based selection method, we also considered a voxel-selection method based on overall activity. First, a  $t$ -test was conducted over the contrast of all 60 conditions > rest in every voxel. Second, voxels with a  $t$ -value greater than 2.0 were selected (**Figure 2a**, blue voxels). Researchers employ different  $t$ -thresholds to define active voxels. While some choose an arbitrary cutoff such as 2.0 (Long et al., 2018) or 0 (Kay et al., 2017), others select the  $n$  voxels with the highest  $t$ -value, where  $n$  is a somewhat arbitrary size such as 100 (Kriegeskorte et al., 2008; Mur et al., 2013; Jozwick et al., 2016). Based on a student's  $t$ -distribution,  $t=2.0$  roughly corresponds to a significance level of  $p < 0.05$  without corrections for multiple comparisons, making it a relatively liberal threshold.

To compare the data selected by the reliability- and activity-based methods, we asked two questions. First, do these methods result in coverage of different brain regions? **Figure 2a** shows both voxel selections, including active voxels (blue), reliable

voxels (red), and their overlap (purple). In general, the reliability-based selection method isolated a smaller set of voxels that are more localized to the occipito-temporal cortex. This is quantified in **Figure 2b** ( $t(12) = 7.12, p < 0.001$ ). Second, does the average multi-voxel pattern reliability for individual conditions differ between the two methods? **Figure 2c** shows that these patterns are more reliable within the reliable-voxel subset than active-voxel subset ( $t(12) = 15.8, p < 0.001$ ).



## A Regions selected by each method

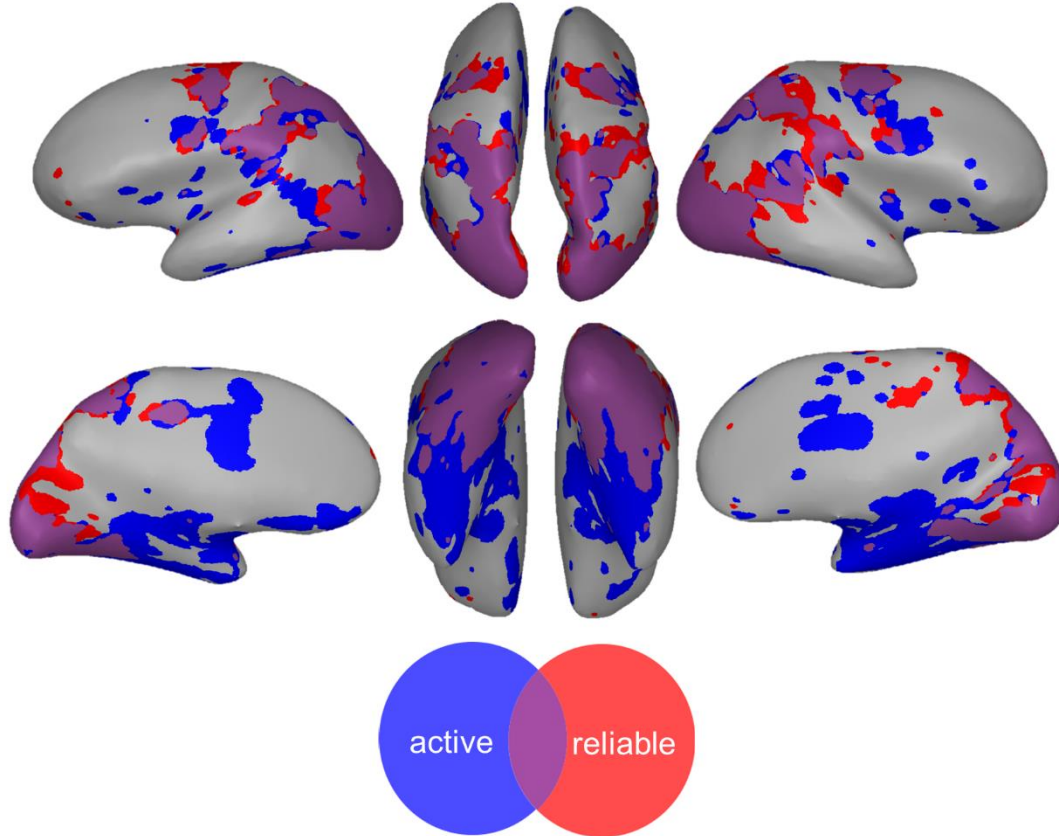

## B Extent of coverage

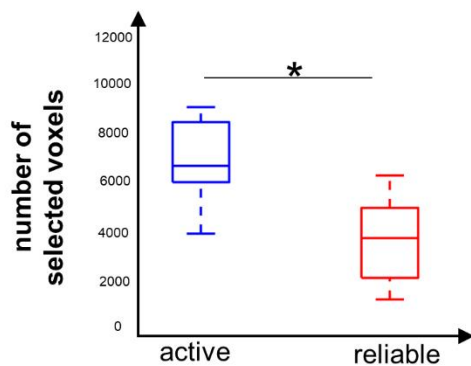

## C Condition-pattern reliability

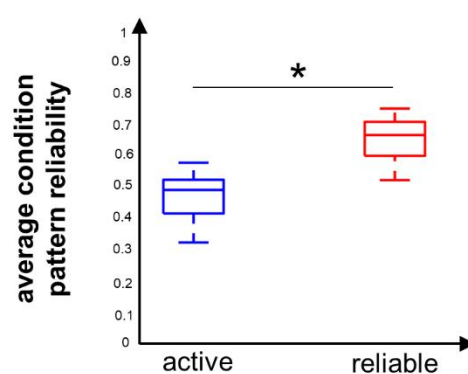

**Figure 2: Comparison between the Data Selected Using Reliability and Activity.** (a) Selected voxels from both methods are plotted on an example subject's inflated cortex. Red voxels are reliable, blue voxels are active, and purple voxels are reliable and active. Voxel selection is shown for the group data. (b) Comparison of the total number of voxels selected by each method. (c) Comparison of the average condition-pattern reliability among selected voxels for each method. For (b) and (c), horizontal lines inside each box indicate the median value across subjects, top and bottom edges indicate the 25<sup>th</sup> and 75<sup>th</sup> quartiles, and whiskers extend to outlier subjects. Asterisks indicate significant paired *t*-tests.

Given that the choice to use an activity threshold of  $t > 2.0$  was arbitrary, it is natural to ask whether these results change if active voxels are defined using a different threshold. In other words, is there an activity threshold such that active and reliable voxels cover the same regions? After considering a range of thresholds between  $t > 0$  and  $t > 3.0$ , we found that the degree of overlap between active and reliable voxels followed a roughly logarithmic curve that plateaus around 80% at  $t > 2.0$  (**Supplemental Methods; Figure S1**). Thus, in this dataset, choosing a different activity threshold would not meaningfully improve the degree of overlap between reliable and active voxels beyond what we observe here. In summary, selecting reliable voxels isolates a more restricted set of regions with higher condition-pattern reliability than active voxels.

### *3.3 How many conditions are necessary?*

Reliability-based voxel selection is well-suited to condition-rich fMRI designs, which expose subjects to many conditions. With very few conditions, the estimates for a voxel's split-half reliability will not be stable, as a correlation based on only a few points is not a robust measurement of a linear relationship (Bonnett & Wright, 2000). How many conditions must one test to employ this voxel selection method?

To answer this question, we performed a simulation analysis based on our example data. We asked how robust the split-half reliability calculation is at a range of numbers of conditions (from 1 to 60). For each possible number of conditions  $c$ , we randomly selected responses to  $c$  conditions, then calculated each voxel's split-half reliability. After doing so 100 times, we calculated the standard deviation of each voxel's split-half distribution. **Figure 3** shows the average standard deviation across voxels for each number of conditions  $c$ . In general, stability improves (standard deviation falls) as the number of conditions grows. However, the pattern is not linear: at a certain point, adding more conditions does not confer additional benefits to stability. In our data, this point occurred at 15 conditions. This suggests that the reliability-based voxel selection method is appropriate for a design measuring responses to 15 or more conditions. Note that this value is lower than the standard recommendation that a correlation should be performed over 25 or more data points (Pearson, 1931; Dunlap, 1931; Gayen, 1951).

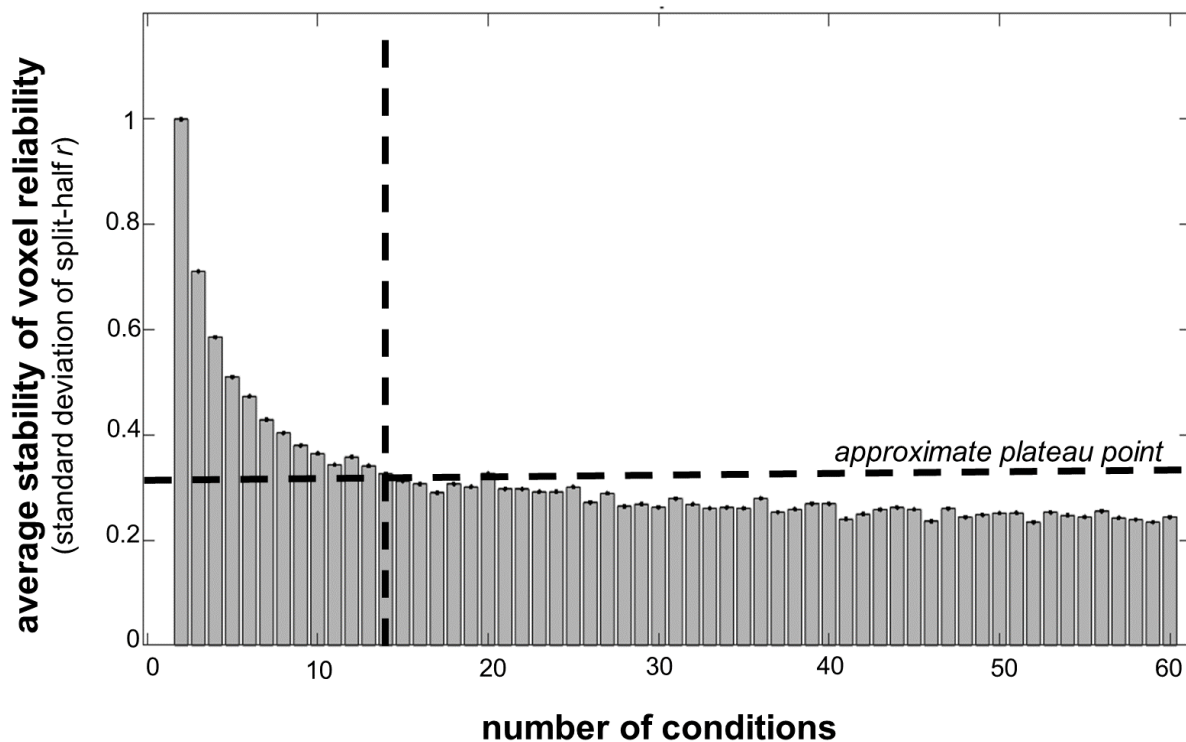

**Figure 3: Estimating the Minimum Number of Conditions for Reliability-Based Voxel Selection.**

Average stability of the voxel reliability calculation is plotted for every number of conditions  $c$  from 1 to 60. For each  $c$ , we selected a random subset of whole-brain responses to  $c$  conditions. We then calculated the split-half reliability for every voxel within those subsetted data. This procedure was repeated over 100 iterations. Stability was calculated for each voxel as the standard deviation of split-half reliability over the 100 iterations, then averaged across voxels. Crosshairs indicate the approximate point at which the tradeoff between number of conditions and instability begins to plateau (15 conditions), meaning that this is the minimum number of conditions needed to use this reliability-based voxel selection method.

### 3.4 Replication

These findings replicated in an independent dataset of responses to 72 real-world objects (**Figure 4a**). **Figure 4b** shows the split-half reliability for this dataset over the brain. Based on the reliability curve shown in **Figure 4b**, we selected a reliability cutoff of  $r > 0.30$ . Although it is striking that we found the same cutoff in both datasets, we assume that this is mere coincidence. As we found in the first dataset, reliable voxels surviving this cutoff were less extensive than active voxels ( $t(10) = 3.89$ ,  $p < 0.01$ ; **Figure 4c**). In the temporal, parietal, and lateral occipital cortices, reliable voxels were primarily a subset of active voxels. Whereas for the most part reliable voxels were a subset of active voxels in the action video dataset, in this dataset early visual regions in the medial occipital cortex contained extensive reliable voxels but very few active voxels. Reliable voxels also had higher condition-pattern reliability than active voxels ( $t(10) = 21.65$ ,  $p < 0.001$ ; **Figure 4c**). Finally, split-half reliability estimates began to

stabilize around 15 conditions, further indicating that this is a good estimate of the minimum number of conditions necessary to employ reliability-based voxel selection.

## A Experimental Design

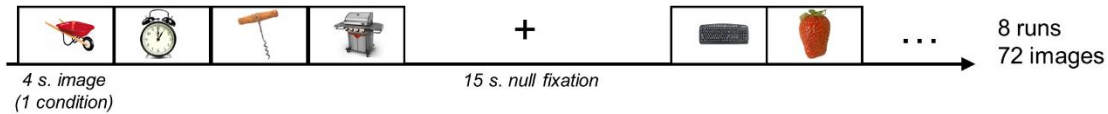

## B Threshold selection

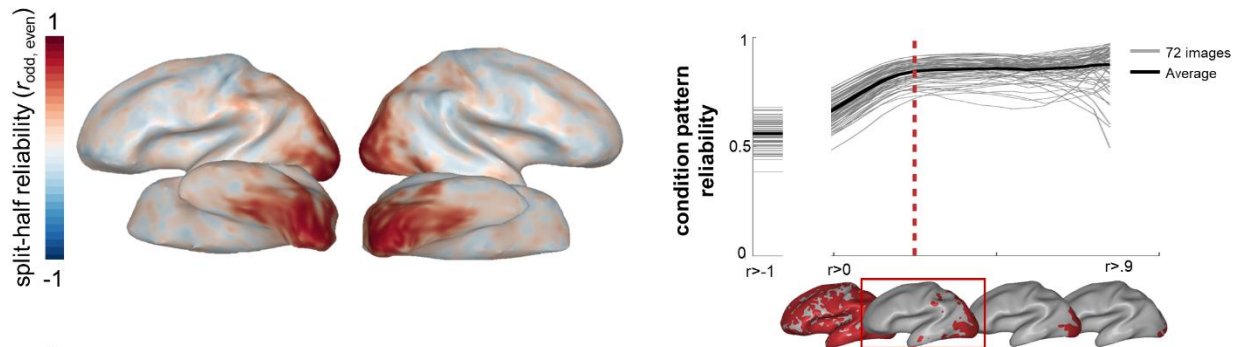

## C Reliable vs. Active Voxels

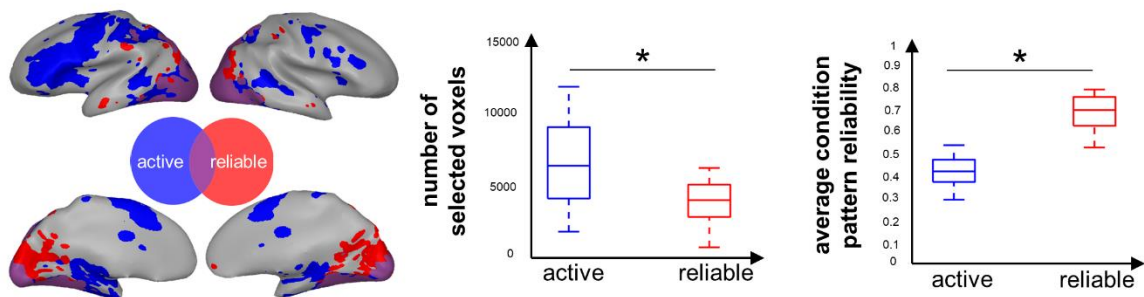

**Figure 4: Replication.** (a) Schematic of the experimental design for the replication dataset: participants viewed images of 72 everyday objects while detecting an occasional red frame to maintain attention. (b) Whole-brain map of split-half voxel reliability in this dataset and curve showing the pattern reliability for each condition (y-axis) at a range of possible voxel inclusion thresholds (x-axis). Red line indicates the final threshold selected for this dataset ( $r = 0.30$ ). (c) Comparison of the voxels selected based on reliability and activity. Selected voxels from both methods are plotted on an example subject's inflated cortex. Red voxels are reliable, blue voxels are active, and purple voxels are reliable and active. Voxel selection is shown for the group data. Plots compare the total number of voxels selected by each method (left) and the average condition-pattern reliability among selected voxels for each method (right). Horizontal lines inside each box indicate the median value across subjects, top and bottom edges indicate the 25<sup>th</sup> and 75<sup>th</sup> quartiles, and whiskers extend to outlier subjects. Asterisks indicate significant paired  $t$ -tests.

### 3.4 Relationship with Classification Accuracy

Our method is intended as a first analysis step, prior to any analyses targeting the research question (e.g. voxel-wise encoding or classification tests). Given this, are

these selected voxels actually “good” ones for the critical analysis, or would another set have produced a better outcome? To get a sense of this, we conducted a specific analysis – pairwise classification – at a range of voxel-reliability thresholds. In this analysis, we calculated our ability to distinguish any two action conditions from each other using their multivoxel patterns (averaged across all pairs of 60 actions; see **Supplemental Methods**).

**Figure 5** shows the average classification accuracy as a function of voxel-reliability threshold. Accuracy increased when restricting the analysis to voxels with higher reliability up to a threshold of  $r = 0.60$  (accuracy = 87.2%), and interestingly then began to fall around  $r = 0.7$ . Note that this drop in accuracy is not due to a catastrophic loss of coverage – over 1,000 voxels survived the threshold at  $r = 0.7$  (see inset). For comparison, the red dashed line indicates our reliability-based voxel-selection threshold, which is at or near the point where this accuracy curve plateaus. This pattern replicated in the second dataset (responses to 72 real-world objects; **Supplemental Figure 2**). Thus, reliability-based voxel selection can yield a reasonable classification performance, even though the outcome measure is not directly leveraged during voxel selection.

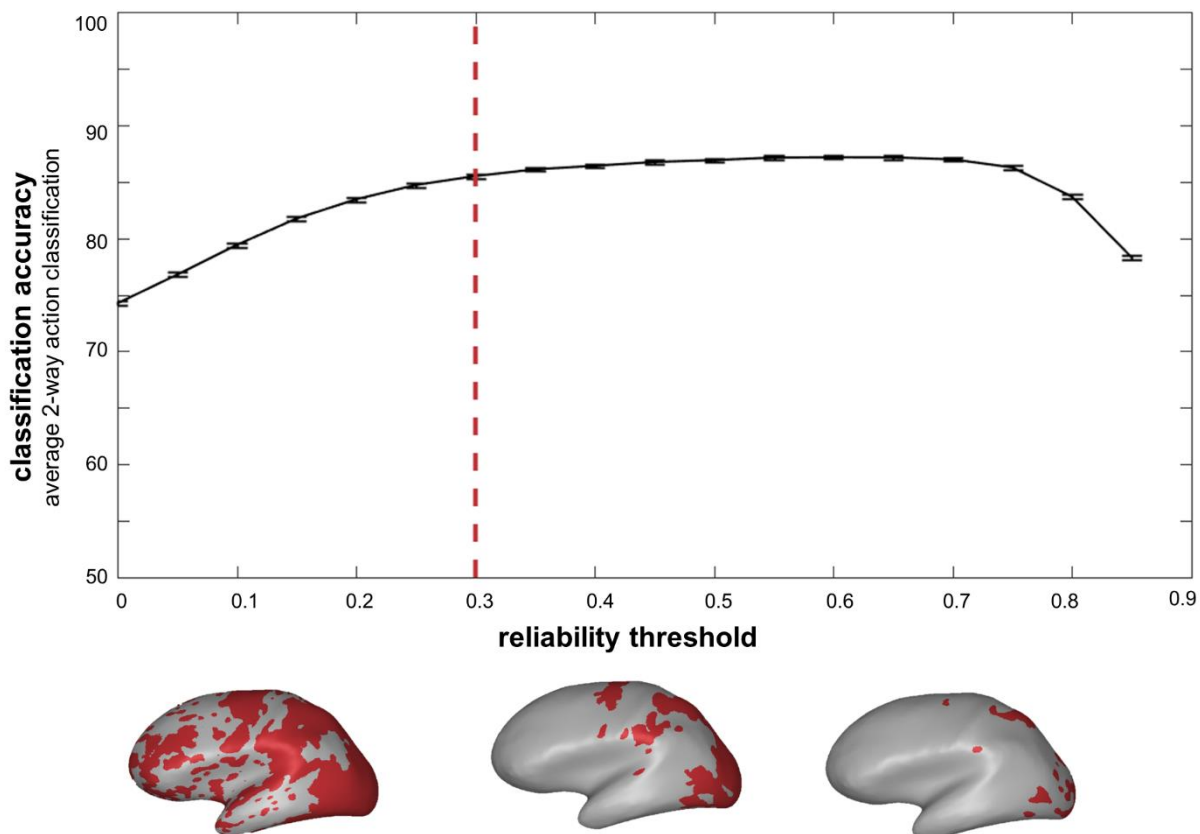

**Figure 5: Classification Accuracy.** Results of the pairwise action classification analysis are plotted at a range of reliability thresholds. The black curve indicates average performance across action pairs, and error bars indicate the standard error of the mean. Brain figures show the reliable coverage for the group data at three sample thresholds:  $r = 0.1$ ,  $0.4$ , and  $0.7$ . Red dashed line indicates the final reliability threshold selected for this dataset ( $r = 0.3$ ).



## 4. DISCUSSION

The method we have outlined here introduces a new way to select voxels from the whole brain that respond systematically to experimental variations. We found that this method selects voxels with more limited coverage and higher multi-voxel condition-pattern reliability than activity-based selection. In addition, this method is straightforward to implement and is informed by the data, rather than by *a priori* parameters that specify a statistical cut-off or a fixed region size. Once selected, reliable voxels could be entered into a wide range of hypothesis-driven analyses; therefore, we suggest that reliability-based voxel selection is a promising first step to make subsequent fMRI analyses more robust.

### 4.1 *What properties differentiate reliable and active brain regions?*

Given that activity- and reliability- based voxel selection result in different sets of voxels, are there interesting differences in the neural signals present in these regions? One possibility is that, while activity-based voxel selection takes noise into account to some extent, some active voxels are still more noisy than reliable voxels. Another possibility is that “active” regions are less sensitive to the condition structure in the data. Whereas reliability requires some variance among conditions, a region can be “active” even if it responds with equal magnitude to all conditions. Therefore, if a researcher predicts that equal response magnitudes across all conditions would be meaningful – for example, if she hypothesizes that a scene-processing region will respond equally across all outdoor and indoor scenes – overall activity might be a reasonable way to select voxels. In contrast, a researcher using an analysis that leverages the variance in the data, such as encoding models, representational similarity analysis, or most univariate analyses, should select regions whose responses vary across conditions.

### 4.2 *Comparison with Outcome-Based Methods*

Apart from activity-based selection, one of the main alternatives to reliability-based voxel selection is to identify voxels based on the outcome of an analysis; for example, to identify voxels where a model is well-fit. While such outcome-based methods are a useful tool in some situations, reliability-based selection offers three advantages that make it more generally applicable. First, reliability-based selection may identify regions that have sufficient variance to be included in the analysis, but nevertheless do not show the hypothesized effect. This is informative because it allows researchers to conclude something about the representations in both the regions where the effect exists (they match the prediction), and those where it doesn't (they have some other format, which is still reliable). In contrast, with an outcome-based voxel selection method it would be impossible to conclude anything about the unselected regions: they could show no effect, or they could simply contain bad data. Second, reliability-based voxel selection makes it easy to select regions for multiple kinds of analyses. For example, if a researcher plans to use model comparisons to determine which candidate



features fit the data the best, which model should she use to select her voxels? Reliability-based voxel selection avoids this situation by divorcing the selection procedure from the analysis outcome. Finally, reliability-based voxel selection allows researchers to select voxels using the same dataset that will be used for the critical analyses; in contrast, outcome-based measures require separate datasets for selecting well-fit voxels and testing the fit of those voxels.

#### 4.3 Double-dipping

If all the data are used to select voxels, do we run the risk of double-dipping (Kriegeskorte et al., 2009)? Double-dipping occurs when the voxel selection procedure biases subsequent analyses in the direction of the hypothesis by capitalizing on favorable noise. For example, if an ROI is defined based on the contrast viewing pictures of faces > viewing pictures of objects, then the estimate of how much more this ROI responds to faces than objects will be biased if assessed with the same data that were used to define the ROI. In such a case, it is important to use separate datasets to define and test the ROI, to avoid inflating or even fabricating effects due to noise in the direction of the hypothesis. In contrast, our method merely finds voxels that reliably respond more to some conditions than others, without any reference to *which* conditions those are (e.g., Norman-Haignere et al., 2015; Mitchell et al., 2008). This is also true of activity-based voxel selection – many researchers who use this method define their voxels and analyze their responses in the same dataset (e.g., Long et al., 2018). Thus, any subsequent assessment that involves comparing condition responses is not biased by our voxel selection procedure.

To illustrate this more intuitively, suppose participants saw images of many different objects. As experimenters, we may be interested in whether any voxels respond parametrically based on the real-world size of the objects, or how graspable the objects are, or how aesthetically pleasing the objects are. We could reasonably use the whole dataset to define a set of reliable voxels in which to run such an analysis, because there is no guarantee that the selected voxels will respond according to our dimensions of interest. Some might respond more to big than small objects, and others might respond more to redder than bluer objects. The selection procedure does not bias an analysis searching for hypothesized representations. Thus, researchers can leverage the entire data set and use reliability-based voxel selection as a first step after collecting condition-rich fMRI data; and this step can be completely separate from any subsequent hypothesis-driven analyses.

Alternatively, it is possible to use a variant of this method to find the threshold that maximizes the outcome of an analysis (e.g. in our pairwise classification analysis, choosing a threshold of  $r > 0.4$  would have produced higher overall accuracy than our selected threshold of  $r > 0.3$ .) However, choosing a voxel cut-off based on the overall outcome would be an example of circularity. Instead, in this variant of the method, the

threshold should be first selected within a training dataset; then, classification accuracy can be computed from independent data. This avoids both circularity (by not biasing the outcome through the selection process) and  $p$ -hacking (by not cherry-picking parameter settings, such as the number of voxels to use). In general, when selecting voxels to optimize for a particular outcome measure, the data should be split into independent sets; however, when selecting a threshold based on the reliability alone, this step can be avoided.

#### *4.4 Novel Applications*

This voxel selection method also allows for several variants, which highlight the many facets of reliability. Data can be reliable over different sources of variation – while we calculated split-half reliability between odd and even fMRI runs (variation in time), one could split the data in other ways to isolate meaningfully-different brain regions. For example, if an experiment includes two stimulus sets – perhaps set 1 contains photographs of real-world objects and set 2 contains drawings of the same objects – one could use this method to find regions that respond reliably across the two sets. This would isolate regions that are robust to low-level variations in stimuli, suggesting that their responses reflect higher-level properties of the stimuli, such as object shape or identity. One could also calculate reliability across subject groups – for example, to identify regions that respond consistently to hearing the names of object in blind and sighted participants. This variant of the method would imply that the responses of the selected regions in the sighted may not solely be related to visual responsiveness. In a different vein, one could improve the reliability of region-of-interest analyses by selecting the reliable voxels that lie within a region of interest or functional parcel (Federenko et al., 2010; Julien et al., 2012). It is also possible to calculate the reliability of distances between conditions, within a representational similarity framework (Thornton & Mitchell, 2017). In general, requiring reliable responses over different manipulations—be they at the stimulus, task, or subject group level—can help to isolate the most relevant brain regions for the theoretical question at hand.

#### *4.5 Selecting Voxels at the Single-Subject and Group Levels*

In our data, we found voxel inclusion thresholds that were highly consistent across subjects and the group data. However, this does not guarantee that reliable voxels surviving those thresholds will overlap perfectly across subjects. In the primary dataset examined here, subjects' reliable coverage using the same cut-off varied from 1,596 to 6,879 voxels with a 3x3x3 mm resolution. Thus, the choice to use this voxel selection method at the level of single subjects or the group depends upon the kind of question being asked.

For example, in a single-subject approach, one could define reliable voxels separately in each subject, and then perform single-subject analyses in those voxels. This approach is particularly useful if the question concerns the link between an

individual's experience, traits, or judgments and their neural responses. However, this approach may force the experimenter to analyze different brain regions in different subjects. An alternative approach is to do a group-level analysis, defining reliable voxels based on the group data, then only analyze the group data.

In many cases, a hybrid analysis scheme may be appropriate: the voxels are defined using the group data, and all single-subject analyses can be performed within that set of voxels. This approach guarantees that the same regions will be examined across subjects, enabling the researcher to compare response maps between subjects. However, some of the data will inevitably come from unreliable voxels. Therefore, it is important to interpret each subject's results in light of their reliable coverage.

## **5. CONCLUSIONS**

In summary, reliability-based voxel selection is a principled method for isolating regions of the brain for further analysis that is informed by the stable structure in the dataset. The strengths of this method are that (i) it is straightforward to implement, making it easy to adopt into a variety of fMRI analysis settings, (ii) it is agnostic to *a priori* hypotheses about which conditions drive which cortex where, and (iii) it puts the emphasis on data reliability as an early step in fMRI data analysis processing.

## **ACKNOWLEDGEMENTS**

We are grateful to Emilie Josephs and the Cambridge Writing Group for their support during the writing process. Funding for this project was provided by NIH grant S10OD020039 to Harvard University Center for Brain Science, NSF grant DGE1144152 to L.T., and the Star Family Challenge Grant to T.K.

## REFERENCES

- Bonnett, D. G., & Wright, T. A. (2000). Sample size requirements for estimating Pearson, Kendall, and Spearman correlations. *Psychometrika*, 65, 23-28.
- Cox, D. D., & Savoy, R. L. (2003). Functional magnetic resonance imaging (fMRI) “brain reading”: detecting and classifying distributed patterns of fMRI activity in human visual cortex. *Neuroimage*, 19(2), 261-270.
- Duncan, J., & Owen, A. M. (2000). Common regions of the human frontal lobe recruited by diverse cognitive demands. *Trends in Neurosciences*, 23(10), 475-483.
- Dunlap, H. F. (1931). An empirical determination of the distribution of means, standard deviations and correlation coefficients drawn from rectangular populations. *The Annals of Mathematical Statistics*, 2(1), 66-81.
- Eklund, A., Nichols, T. E., & Knutsson, H. (2016). Cluster failure: why fMRI inferences for spatial extent have inflated false-positive rates. *Proceedings of the National Academy of Sciences*, 201602413.
- Gayen, A. (1951). The frequency distribution of the product-moment correlation coefficient in random samples of any size drawn from non-normal universes. *Biometrika*, 38(1/2), 219-247.
- Güçlü, U., & van Gerven, M. A. (2015). Deep neural networks reveal a gradient in the complexity of neural representations across the ventral stream. *Journal of Neuroscience*, 35(27), 10005-10014.
- Hanson, S.J., Matsuka, T., Haxby, J.V., 2004. Combinatorial codes in ventral temporal lobe for object recognition: Haxby (2001) revisited: is there a “face” area? *Neuroimage* 23 (1), 156–166.
- Hasson, U., Levy, I., Behrmann, M., Hendler, T., & Malach, R. (2002). Eccentricity bias as an organizing principle for human high-order object areas. *Neuron*, 34(3), 479-490.
- Hasson, U., Harel, M., Levy, I., & Malach, R. (2003). Large-scale mirror-symmetry organization of human occipito-temporal object areas. *Neuron*, 37(6), 1027-1041.
- Haxby, J. V., Guntupalli, J. S., Connolly, A. C., Halchenko, Y. O., Conroy, B. R., Gobbini, M. I., Hanke, M., & Ramadge, P. J. (2011). A common, high-dimensional model of the representational space in human ventral temporal cortex. *Neuron*, 72(2), 404-416.
- Haxby, J. V. (2012). Multivariate pattern analysis of fMRI: the early beginnings. *Neuroimage*, 62(2), 852-855.

- Huth, A. G., Nishimoto, S., Vu, A. T., & Gallant, J. L. (2012). A continuous semantic space describes the representation of thousands of object and action categories across the human brain. *Neuron*, *76*(6), 1210-1224.
- Huth, A. G., de Heer, W. A., Griffiths, T. L., Theunissen, F. E., & Gallant, J. L. (2016). Natural speech reveals the semantic maps that tile human cerebral cortex. *Nature*, *532*(7600), 453.
- Jiang, Y., & Kanwisher, N. (2003). Common neural mechanisms for response selection and perceptual processing. *Journal of Cognitive Neuroscience*, *15*(8), 1095-1110.
- Johansen-Berg, H., Behrens, T. E. J., Robson, M. D., Drobnyak, I., Rushworth, M. F. S., Brady, J. M., ... & Matthews, P. M. (2004). Changes in connectivity profiles define functionally distinct regions in human medial frontal cortex. *Proceedings of the National Academy of Sciences*, *101*(36), 13335-13340.
- Jozwik, K. M., Kriegeskorte, N., & Mur, M. (2016). Visual features as stepping stones toward semantics: Explaining object similarity in IT and perception with non-negative least squares. *Neuropsychologia*, *83*, 201-226.
- Kay, K. N., & Yeatman, J. D. (2017). Bottom-up and top-down computations in word- and face-selective cortex. *Elife*, *6*, e22341.
- Konkle, T., & Oliva, A. (2012). A real-world size organization of object responses in occipitotemporal cortex. *Neuron*, *74*(6), 1114-1124.
- Kriegeskorte, N., Goebel, R., & Bandettini, P. (2006). Information-based functional brain mapping. *Proceedings of the National Academy of Sciences*, *103*(10), 3863-3868.
- Kriegeskorte, N., Mur, M., & Bandettini, P. A. (2008). Representational similarity analysis-connecting the branches of systems neuroscience. *Frontiers in Systems Neuroscience*, *2*, 4.
- Kriegeskorte, N., Simmons, W. K., Bellgowan, P. S., & Baker, C. I. (2009). Circular analysis in systems neuroscience: the dangers of double dipping. *Nature Neuroscience*, *12*(5), 535.
- Lashkari, D., Vul, E., Kanwisher, N., & Golland, P. (2010). Discovering structure in the space of fMRI selectivity profiles. *Neuroimage*, *50*(3), 1085-1098.
- Long, B., Yu, C. P., & Konkle, T. (2018). Mid-level visual features underlie the high-level categorical organization of the ventral stream. *Proceedings of the National Academy of Sciences*, *115*(38), E9015-E9024.

- Magri, C. Long, B., Chiou, R., & Konkle, T. (May, 2019). Behavioral and Neural Associations between Object Size and Curvature. Poster presented at the annual meeting of the Vision Sciences Society, St. Pete's Beach, FL.
- Mitchell, T. M., Shinkareva, S. V., Carlson, A., Chang, K. M., Malave, V. L., Mason, R. A., & Just, M. A. (2008). Predicting human brain activity associated with the meanings of nouns. *Science*, 320(5880), 1191-1195.
- Mur, M., Meys, M., Bodurka, J., Goebel, R., Bandettini, P. A., & Kriegeskorte, N. (2013). Human object-similarity judgments reflect and transcend the primate-IT object representation. *Frontiers in Psychology*, 4, 128.
- Naselaris, T., Stansbury, D. E., & Gallant, J. L. (2012). Cortical representation of animate and inanimate objects in complex natural scenes. *Journal of Physiology-Paris*, 106(5-6), 239-249.
- Nishimoto, S., Vu, A. T., Naselaris, T., Benjamini, Y., Yu, B., & Gallant, J. L. (2011). Reconstructing visual experiences from brain activity evoked by natural movies. *Current Biology*, 21(19), 1641-1646.
- Norman, K.A., Polyn, S.M., Detre, G.J., Haxby, J.V., 2006. Beyond mind-reading: multivoxel pattern analysis of fMRI data. *Trends in Cognitive Science*, Sep. 10 (9), 424-430.
- Norman-Haignere, S., Kanwisher, N. G., & McDermott, J. H. (2015). Distinct cortical pathways for music and speech revealed by hypothesis-free voxel decomposition. *Neuron*, 88(6), 1281-1296.
- Orlov, T., Makin, T. R., & Zohary, E. (2010). Topographic representation of the human body in the occipitotemporal cortex. *Neuron*, 68(3), 586-600.
- Pearson, E. S. (1931). The analysis of variance in cases of non-normal variation. *Biometrika*, 23(1/2), 114-133.
- Pereira, F., Mitchell, T., & Botvinick, M. (2009). Machine learning classifiers and fMRI: a tutorial overview. *Neuroimage*, 45(1), S199-S209.
- Saxe, R., Brett, M., & Kanwisher, N. (2006). Divide and conquer: a defense of functional localizers. *Neuroimage*, 30(4), 1088-1096.
- Tarhan, L., & Konkle, T. (2019). Sociality and Interaction Envelope Organize Visual Action Representations. *bioRxiv*, 618272.
- Thornton, M. A., & Mitchell, J. P. (2017). Theories of person perception predict patterns of neural activity during mentalizing. *Cerebral cortex*, 1-16.



## Supplemental Information

### Table of Contents:

#### **Extended Methods:**

- a. Activity-based Voxel Selections with Different Thresholds
- b. Classification Analysis

**Figure S1:** Comparing Selections at Different Activity Thresholds

**Figure S2:** Replication of the Classification Analysis

## Extended Methods

### *Activity-based Voxel Selections with Different Thresholds*

In the main analysis, the activity-based threshold was set at  $t > 2.0$ . Here, we considered a range of additional thresholds between  $t > 0$  and  $t > 3.0$ . At each threshold, we evaluated the match between the reliable and active voxel selections by calculating the number of voxels that were categorized in the same way (either selected by both methods or ignored by both methods). We then calculated the percent of voxels in the gray matter that met this criterion (**Figure S1**).

### *Classification Analysis*

To determine the effect of reliability-based voxel selection on the outcome of an analysis, we performed pairwise classification of individual conditions at a range of reliability thresholds. We considered every threshold from  $r > 0$  to 0.95 at intervals of 0.05, but only analyzed data for thresholds that were survived by at least 10 voxels. Reliable voxels were defined using the group average data. At each threshold, we iteratively trained a linear support vector machine classifier to distinguish between all condition pairs on 80% of the data, then tested the classifier on the remaining 20% of the data by calculating the percentage of the test responses that were correctly classified. The data for each condition consisted of odd- and even-run responses from each subject. This was done across 100 iterations. Average classification accuracy (averaged across both condition pairs and iterations) is plotted at every threshold in **Figure 5** for the primary dataset and **Figure S2** for the replication dataset.

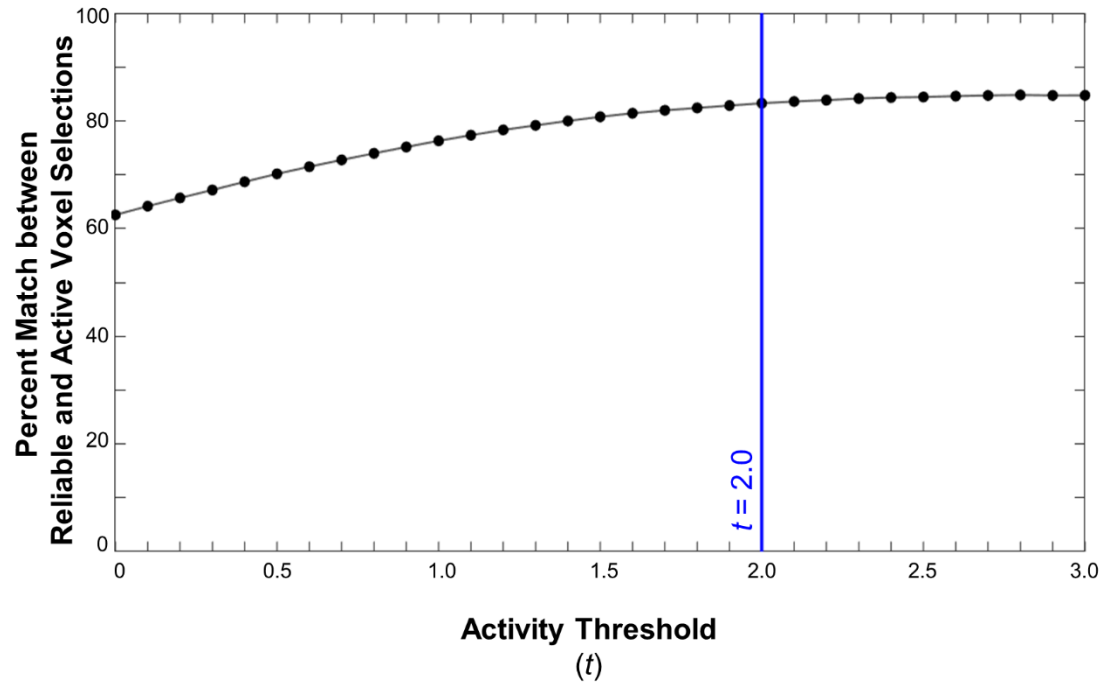

**Figure S1: Comparing Selections at Different Activity Thresholds.** Results of the analysis comparing reliability- and activity-based voxel selections at a range of possible  $t$ -thresholds. At each threshold, the percentage of voxels in the gray matter that were categorized in the same way (selected or not selected) by both voxel selection methods is plotted. Blue line indicates the threshold used to define active voxels in the main analyses ( $t = 2.0$ )

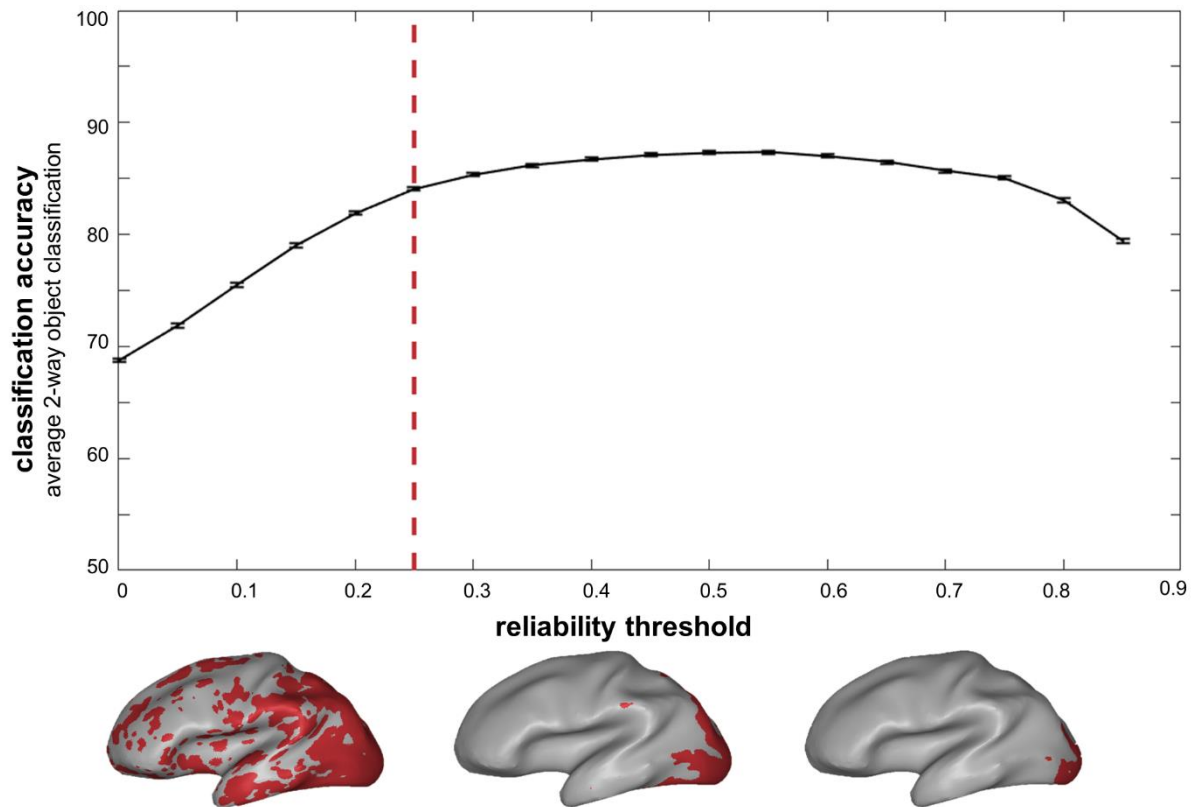

**Figure S2: Replication of the Classification Analysis.** Results of pairwise object classification analysis (decoding responses to 72 object images in the replication dataset) are plotted at a range of reliability thresholds. The black line indicates average performance across object pairs, and error bars indicate standard error of the mean. Brain figures show the reliable coverage in the group data at three sample thresholds:  $r = 0.1$ ,  $0.4$ , and  $0.7$ . Red dashed line indicates the final reliability threshold selected for this dataset.
